# Supplementary material for: Oyster Mushroom Spherical Virus Crosses the Species Barrier and Is Pathogenic to a New Host Pleurotus pulmonarius
Source: MDPI journal article supplement (doi:10.3390/ijms241310584), 2023-06-24
Supplement: s1 [file s1]

**Table S1.** Sequences of primers used in this study.

| Primer | Sequence (5'-3')         | Note <sup>a</sup>                                                                 |
|--------|--------------------------|-----------------------------------------------------------------------------------|
| OMSV-F | ACCCCCCAGGATCTCAAGCTTC   | RT-PCR detection for OMSV [48]                                                    |
| OMSV-R | GAGATGTAGACRTTGAAAGC     |                                                                                   |
| OMIV-F | AACATTGTTGATCACGCTCT     | RT-PCR detection for OMIV [48]                                                    |
| OMIV-R | GGCTTCAGAATAAAGATTGT     |                                                                                   |
| POSV-F | ATCWCATGGCTATCAACCTA     | RT-PCR detection for POSV [48]                                                    |
| POSV-R | AGCTGAATTATCGTCACCCA     |                                                                                   |
| PoV1-F | AAACTCGAAGAGTTCCTTTC     | RT-PCR detection for PoV1 [48]                                                    |
| PoV1-R | GCGCGTGGGCCACGTTCTGGG    |                                                                                   |
| CPNdF  | CATATGATGTCTCTTGCTACCCCC | Used for construction of the prokaryotic expression vector<br>pDB.His.MBP-OMSV-CP |
| CPSaR  | GTCGACGATGACGCCGTACCCG   |                                                                                   |

<sup>a</sup> OMSV, oyster mushroom spherical virus; OMIV, oyster mushroom isomeric virus; POSV, Pleurotus ostreatus spherical virus; PoV1, Pleurotus ostreatus virus 1.

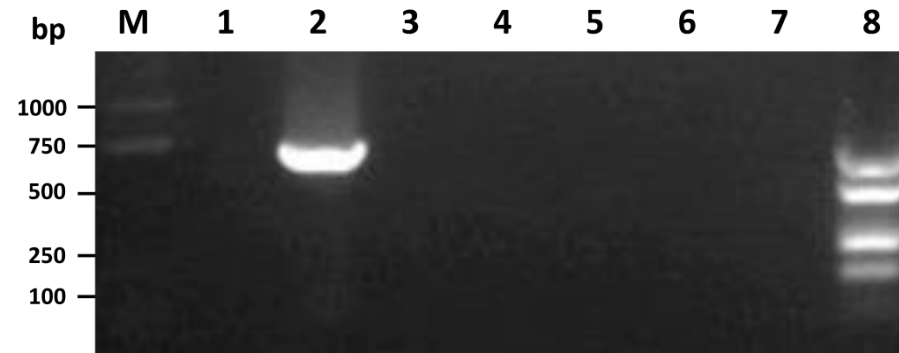

**Figure S1.** Viruses detection of the donor and recipient strains by multiplex RT-PCR before co-cultivation. Lane 1, negative control, the OMSV-free *P. ostreatus* strain. Lane 2, OMSV-infected *P. ostreatus* 8129 strain (donor). Lanes 3-7 represent *P. eryngii* strain C1021, *P. citrinopileatus* strain Y055, *P. nebrodensis* strain BN18, *P. pulmonarius* strain XH2208, and *P. salmoneostramineus* strain TH20901, respectively. Lane 8, the plasmids containing genome sequences of OMSV, PoV1, POSV, and OMIV as positive control [48]. Lane M: GL DNA Marker2000.
